# Supplementary material for: Gold nanoparticles immobilized in hyperbranched polyethylenimine modified polyacrylonitrile fiber as highly efficient and recyclable heterogeneous catalysts for the reduction of 4-nitrophenol
Source: Royal Society of Chemistry journal article supplement (doi:10.1039/c3ta10293a), 2013-01-01
Supplement: c3ta10293a.pdf [file c3ta10293a.pdf]

## ESI

# Gold nanoparticles immobilized in the hyperbranched polyethylenimine modified polyacrylonitrile fiber as highly efficient and recyclable heterogeneous catalysts in the reduction of 4-nitrophenol

**Man-Ling Wang, Ting-Ting Jiang, Yang Lu, Hua-Ji Liu\* and Yu Chen\***

Department of Chemistry, School of Sciences, Tianjin University, Tianjin 300072,  
People's Republic of China

Corresponding author, Tel.: +86-22-27403475; fax: +86-22-27403475

E-mail: [liuhuaji@tju.edu.cn](mailto:liuhuaji@tju.edu.cn) (Hua-Ji Liu); [chenyu@tju.edu.cn](mailto:chenyu@tju.edu.cn) (Yu Chen)

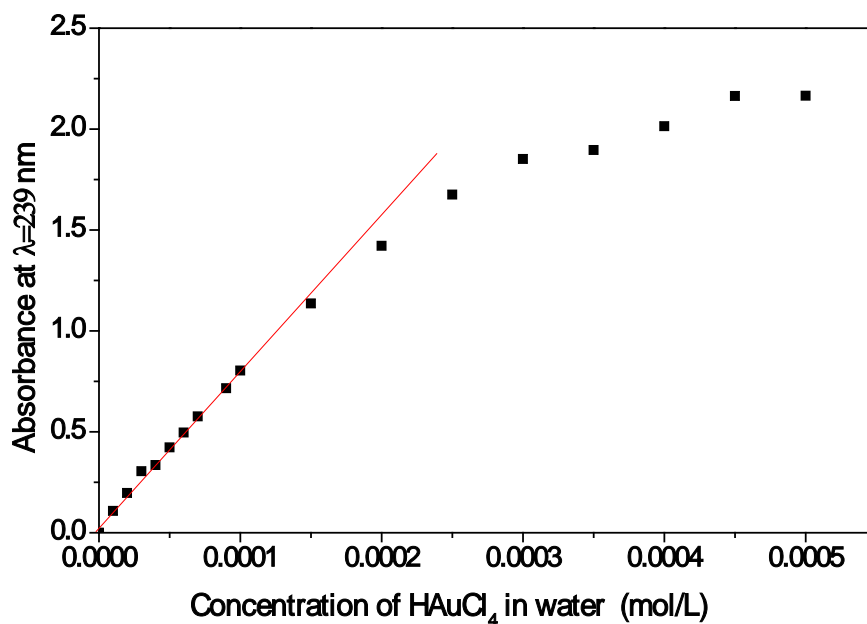

Fig. S1 The relationship of the absorbance intensity at 239 nm with the concentration of HAuCl<sub>4</sub> in water

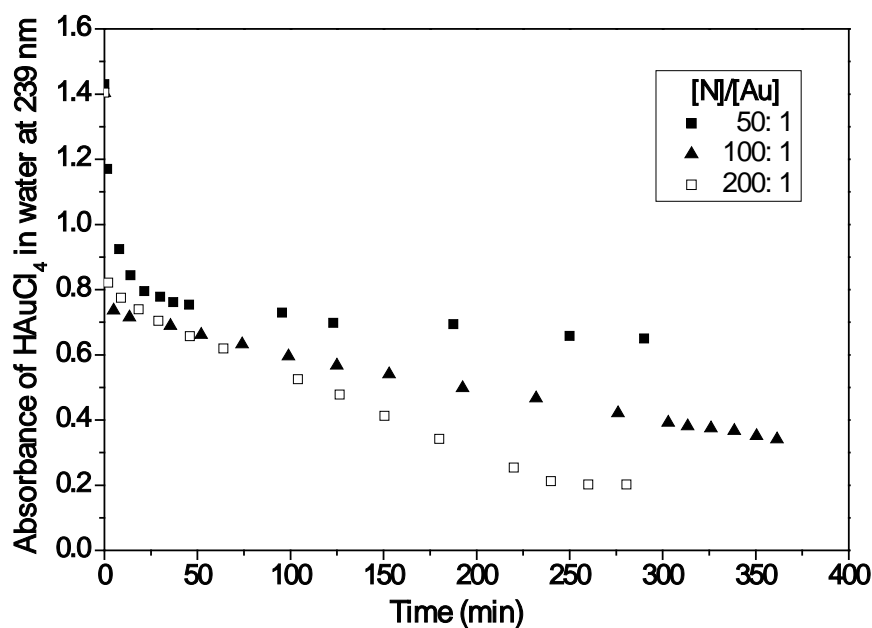

Fig. S2 The typical plots of the variation of UV-vis absorbance of HAuCl<sub>4</sub> in water versus the time in the presence of different amount of PANF-*g*-HPEI, and the ratio of amino groups of PANF-*g*-HPEI to Au atoms was (■) 50, (▲) 100 and (□) 200, respectively. ([HAuCl<sub>4</sub>]<sub>0</sub>=2.5×10<sup>-4</sup> M, PANF-*g*-HPEI<sub>0.31</sub>)

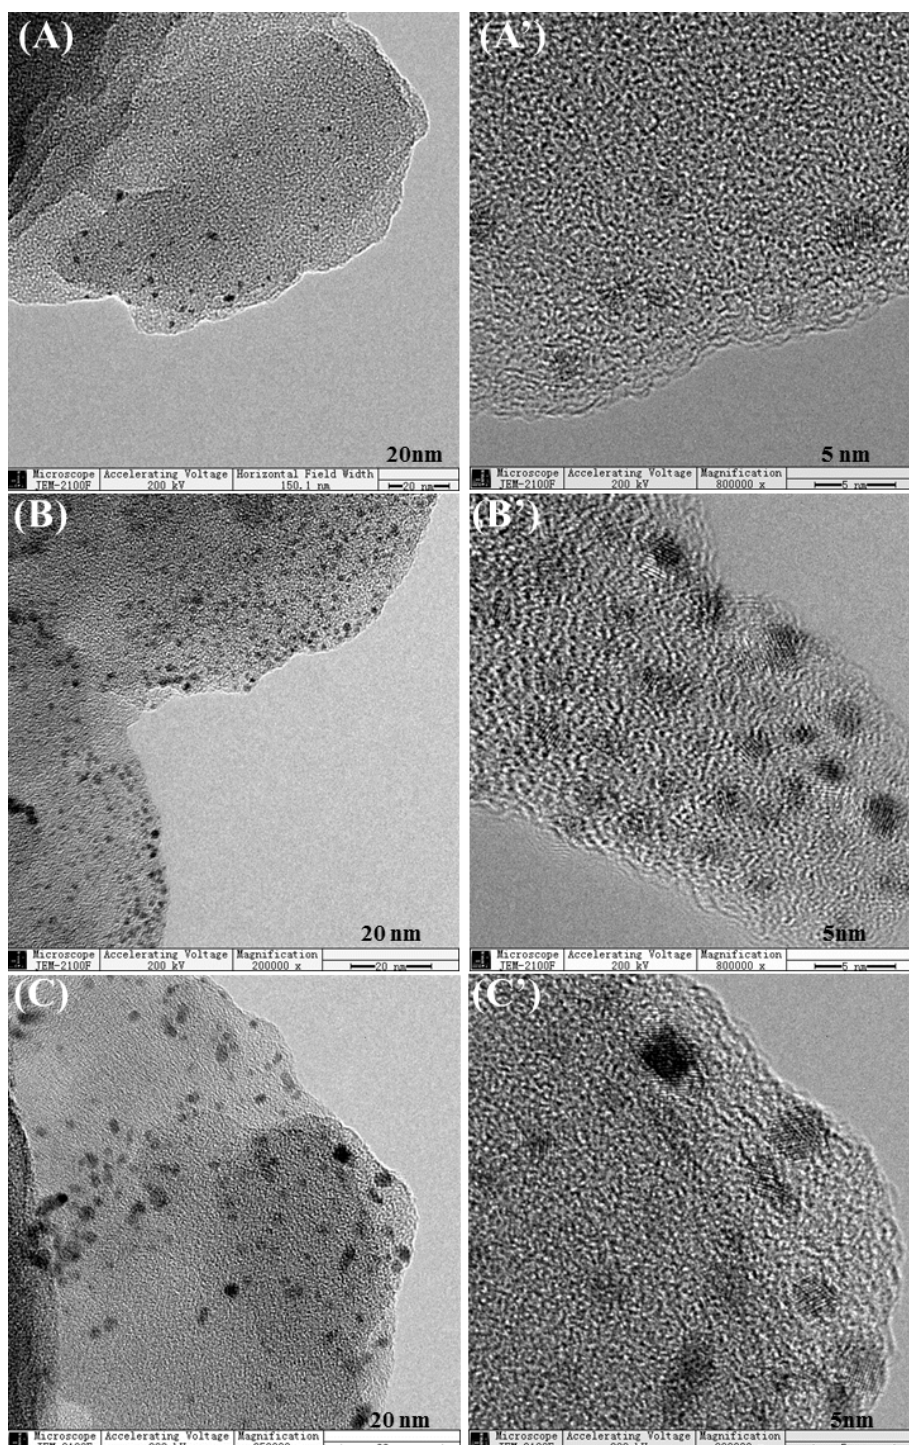

Fig. S3 The typical TEM images of the AuNPs supported by (A, A') PANF-*g*-HPEI<sub>0.31</sub>; (B, B') PANF-*g*-HPEI<sub>0.58</sub>; (C, C') PANF-*g*-HPEI<sub>0.97</sub> (the mixing time of PANF-*g*-HPEIs with the HAuCl<sub>4</sub> aqueous solution is 0.5 h, [N]/[Au]=200)

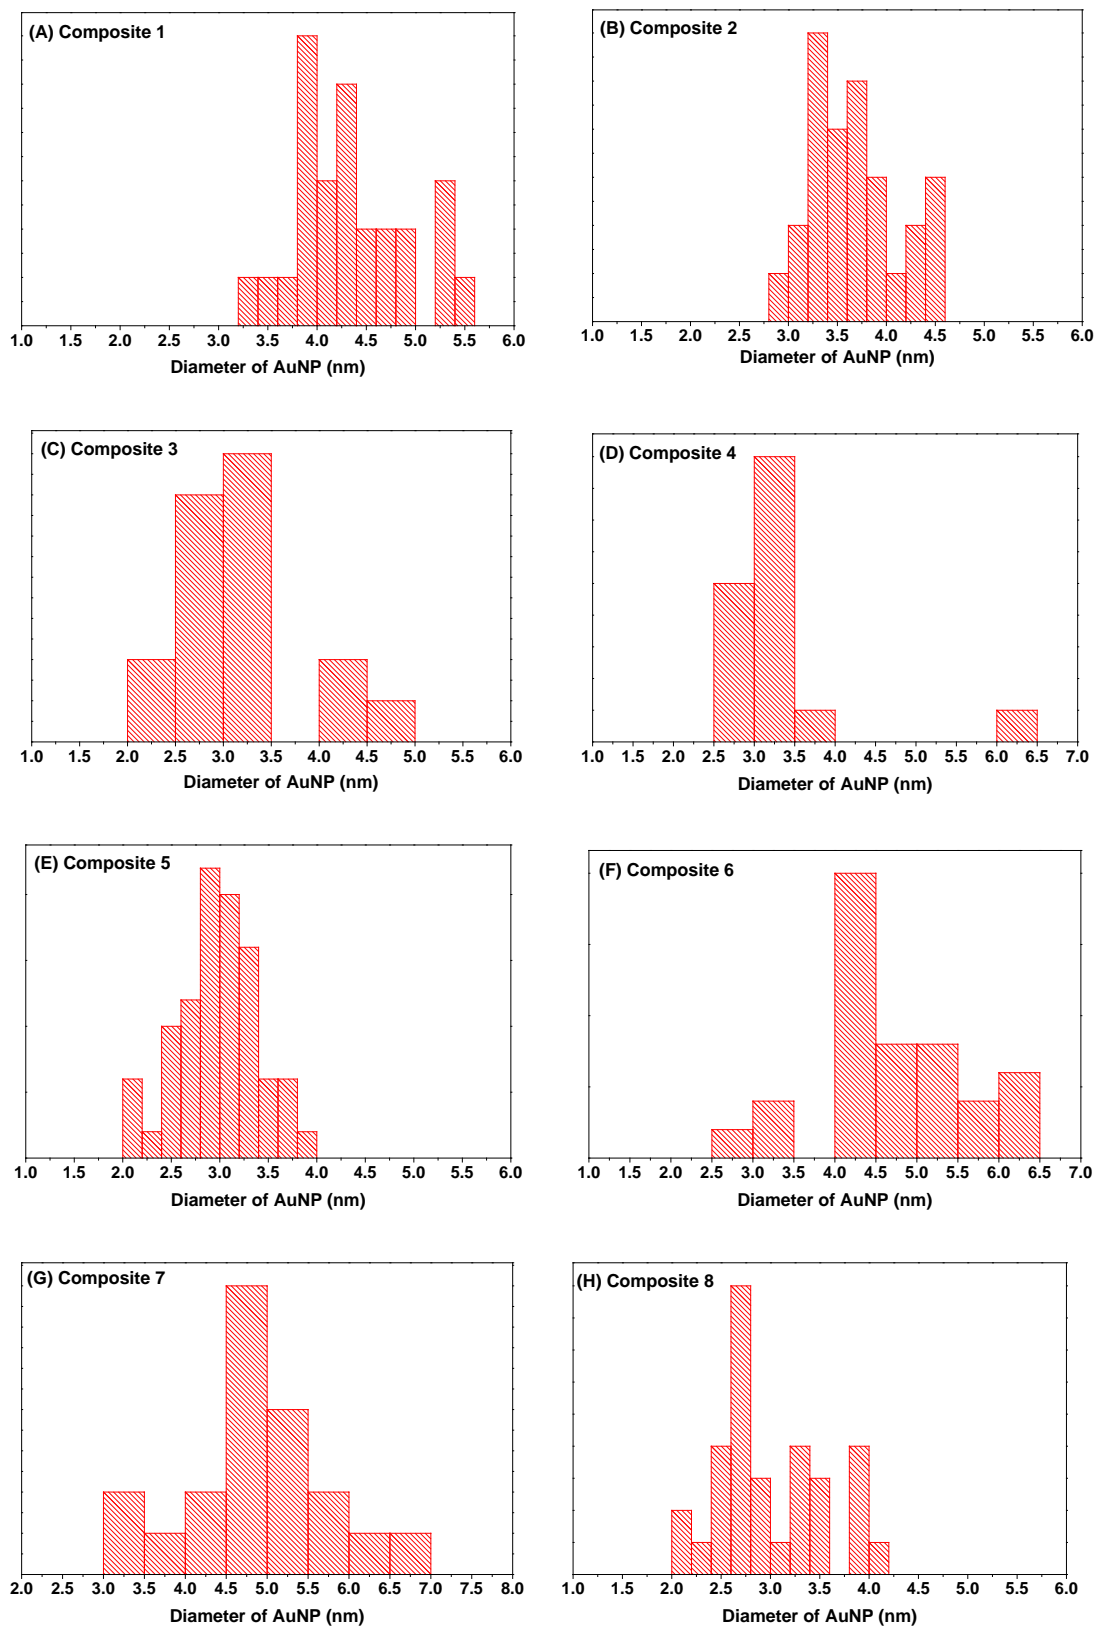

**Fig. S4** The histograms of AuNPs prepared according to the condition of Table 2

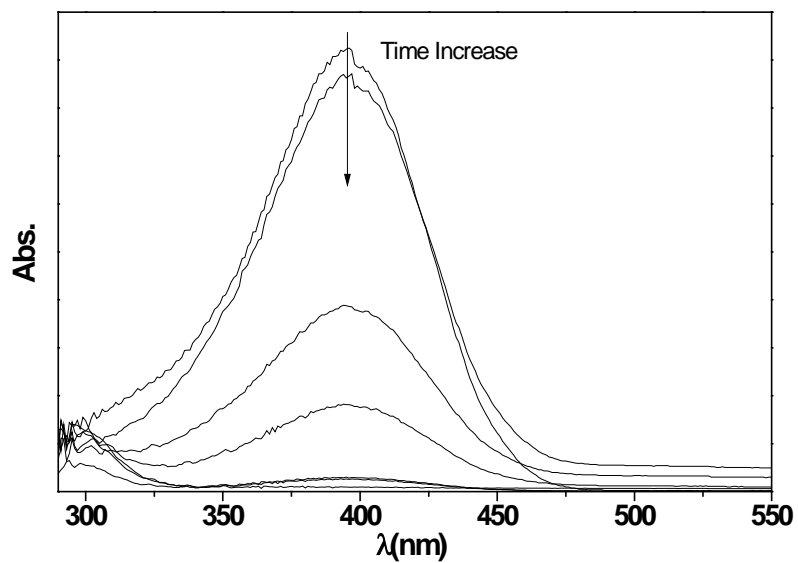

**Fig. S5** The typical UV-vis absorbance spectra of the AuNP catalyzed reduction of 4-nitrophenol by  $\text{NaBH}_4$

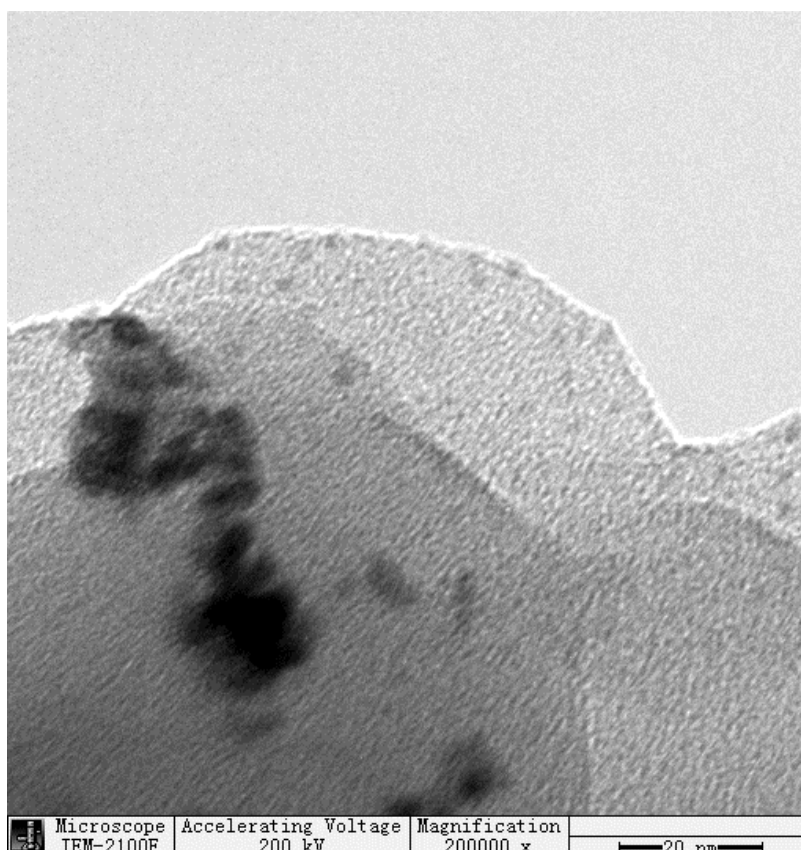

**Fig. S6** Typical TEM image of AuNPs showing very less catalytic activity after reusing certain times
